# Supplementary material
Source: Research Square preprint supplement (doi:10.21203/rs.3.rs-9039624/v1)
Supplement: Supplementary file 1 [file 41cba29d7470ad9c947528d6.docx]

Fig 1A

|  | P value |
| --- | --- |
| OK6/*Gt*ACR1 vs +/*Gt*ACR1 | 0.0006 |
| OK6/*Gt*ACR1+ATR vs OK6/*Gt*ACR1 | 0.0012 |
| OK6/XXM vs +/XXM | 0.0006 |
| OK6/XXM+ATR vs OK6/XXM | 0.0012 |

Fig 1B

|  | P value |
| --- | --- |
| OK6/*Gt*ACR1 vs +/*Gt*ACR1 | 0.0008 |
| OK6/*Gt*ACR1+ATR vs OK6/*Gt*ACR1 | 0.0403 |
| OK6/XXM vs +/XXM | <0.0001 |
| OK6/XXM+ATR vs OK6/XXM | <0.0001 |

Fig 1C

|  | P value |
| --- | --- |
| OK6/*Gt*ACR1 vs +/*Gt*ACR1 | <0.0001 |
| OK6/*Gt*ACR1+ATR vs OK6/*Gt*ACR1 | <0.0001 |
| OK6/XXM vs +/XXM | <0.0001 |
| OK6/XXM+ATR vs OK6/XXM | 0.0055 |

Fig 1G

|  | P value |
| --- | --- |
| OK6/*Gt*ACR1 vs +/*Gt*ACR1 | 0.0022 |
| OK6/*Gt*ACR1+ATR vs OK6/*Gt*ACR1 | 0.0012 |
| OK6/XXM vs +/XXM | 0.0012 |
| OK6/XXM+ATR vs OK6/XXM | 0.0012 |

Fig 1H

|  | P value |
| --- | --- |
| OK6/XXM vs +/XXM | <0.0001 |
| OK6/XXM+ATR vs OK6/XXM | 0.0015 |

Fig 1I

|  | P value |
| --- | --- |
| w1118 vs w1118 + ATR | 0.2839 |
| OK6/*Gt*ACR1 vs w1118 | 0.014 |
| OK6/*Gt*ACR1 + ATR vs OK6/*Gt*ACR1 | 0.0045 |
| OK6/XXM vs w1118 | 0.2945 |
| OK6/XXM+ATR vs OK6/XXM | 0.1736 |

Fig 2F

|  | P value |
| --- | --- |
| - ATR vs +ATR | 0.0006 |

Fig 3A

| *Gt*ACR1 | |
| --- | --- |
|  | P value |
| NMG-Cl pH=7.5 vs. NMG-Cl pH=9.0 | 0.9993 |
| NMG-Cl pH=7.5 vs. 25 mM Cl pH=7.5 | <0.0001 |
| NMG-Cl pH=7.5 vs. High Na pH=7.5 | 0.6227 |
| NMG-Cl pH=7.5 vs. High K pH=7.5 | 0.6379 |

| *Gt*ACR1(K238R) | |
| --- | --- |
|  | P value |
| NMG-Cl pH=7.5 vs. NMG-Cl pH=9.0 | 0.499 |
| NMG-Cl pH=7.5 vs. 25 mM Cl pH=7.5 | <0.0001 |
| NMG-Cl pH=7.5 vs. High Na pH=7.5 | 0.715 |
| NMG-Cl pH=7.5 vs. High K pH=7.5 | 0.8334 |

Fig 3B

| XXM 2.0 | |
| --- | --- |
|  | P value |
| NMG-Cl pH=7.5 vs. NMG-Cl pH=9.0 | <0.0001 |
| NMG-Cl pH=7.5 vs. 25 mM Cl pH=7.5 | 0.9307 |
| NMG-Cl pH=7.5 vs. High Na pH=7.5 | 0.0005 |
| NMG-Cl pH=7.5 vs. High K pH=7.5 | <0.0001 |

| XXM 2.0(K257R) | |
| --- | --- |
|  | P value |
| NMG-Cl pH=7.5 vs. NMG-Cl pH=9.0 | <0.0001 |
| NMG-Cl pH=7.5 vs. 25 mM Cl pH=7.5 | 0.8986 |
| NMG-Cl pH=7.5 vs. High Na pH=7.5 | <0.0001 |
| NMG-Cl pH=7.5 vs. High K pH=7.5 | <0.0001 |

Fig 3C

| BR(K216R) | |
| --- | --- |
|  | P value |
| NMG-Cl pH=7.5 vs. NMG-Cl pH=9.0 | 0.999 |
| NMG-Cl pH=7.5 vs. 25 mM Cl pH=7.5 | 0.5908 |
| NMG-Cl pH=7.5 vs. High Na pH=7.5 | <0.0001 |
| NMG-Cl pH=7.5 vs. High K pH=7.5 | <0.0001 |

Fig 3E

|  | P value (20 μM Ca vs 20 mM Ca) |
| --- | --- |
| *Gt*ACR1 | 0.6651 |
| XXM 2.0 | 0.0006 |
| XXM | 0.0012 |
| CapChR2 | 0.0002 |
| BR | 0.0012 |
| *Be*Cyclop | 0.2684 |

Fig 4A

|  | P value (Without ATR vs With ATR） |
| --- | --- |
| *Be*Cyclop | 0.1556 |
| *Gt*ACR1 | 0.0003 |
| XXM 2.0 | 0.0077 |
| XXM | 0.0012 |
| CapChR2 | 0.0035 |

Fig 4B

|  | P value (Without ATR vs With ATR） |
| --- | --- |
| *Gt*ACR1 | 0.0002 |
| XXM 2.0 | 0.0003 |
| XXM | 0.0006 |
| CapChR2 | 0.0029 |

Fig 4D（DarK conductance）

|  | P value (Without ATR vs With ATR） |
| --- | --- |
| XXM 2.0 | <0.0001 |
| XXM | 0.0001 |
| CapChR2 | 0.0125 |

Fig S2E

| Bouton count | |
| --- | --- |
|  | P value |
| w¹¹¹⁸ vs w¹¹¹⁸ + ATR | 0.1265 |
| OK6/*Gt*ACR1 vs w¹¹¹⁸ | 0.9698 |
| OK6/*Gt*ACR1 + ATR vs OK6/*Gt*ACR1 | 0.547 |
| OK6/XXM vs w¹¹¹⁸ | 0.6397 |
| OK6/XXM + ATR vs OK6/XXM | 0.2011 |

| AZ count | |
| --- | --- |
|  | P value |
| w¹¹¹⁸ vs w¹¹¹⁸ + ATR | 0.7381 |
| OK6/*Gt*ACR1 vs w¹¹¹⁸ | 0.6498 |
| OK6/*Gt*ACR1 + ATR vs OK6/*Gt*ACR1 | 0.3607 |
| OK6/XXM vs w¹¹¹⁸ | 0.7795 |
| OK6/XXM + ATR vs OK6/XXM | 0.507 |

| Area/Bounton ratio | |
| --- | --- |
|  | P value |
| w¹¹¹⁸ vs w¹¹¹⁸ + ATR | 0.4031 |
| OK6/*Gt*ACR1 vs w¹¹¹⁸ | 0.9051 |
| OK6/*Gt*ACR1 + ATR vs OK6/*Gt*ACR1 | 0.0078 |
| OK6/XXM vs w¹¹¹⁸ | 0.4683 |
| OK6/XXM + ATR vs OK6/XXM | 0.5358 |

Fig S3D

|  | P value |
| --- | --- |
| - ATR vs +ATR | 0.0006 |

Fig S4B

|  | P value |
| --- | --- |
| NMG-Cl pH=9 vs NMG-Cl pH=7.5 | 0.6484 |

Fig S5C

|  | P value (20 μM Ca vs 20 mM Ca） |
| --- | --- |
| *Gt*ACR1 K238R | 0.0556 |
| XXM 2.0 K257R | 0.0012 |
| CapChR2 K237R | 0.0012 |
| BR K216R | 0.0002 |

Fig S9

|  | P value (WT vs ΔTrOP2) |
| --- | --- |
| 0 (Dark) | 0.9993 |
| 3 | <0.0001 |
| 10 | <0.0001 |
| 30 | 0.8672 |
